# Supplementary material
Source: publisher figshare collection journal article supplement (https://acs.figshare.com/ndownloader/files/9736654)
Supplement: Supplementary file 1 [file 9736654]

# **Electrochemical Cycling of Polycrystalline Silver Nanoparticles Produces Single Crystal Silver Nanocrystals**

**Poonam Singh, Ray W. Carpenter and Daniel A. Buttry<sup>\*</sup>**

**School of Molecular Sciences**

**Arizona State University**

**Tempe, AZ 85287-1604**

**Corresponding author: [dbuttry@asu.edu](mailto:dbuttry@asu.edu)**

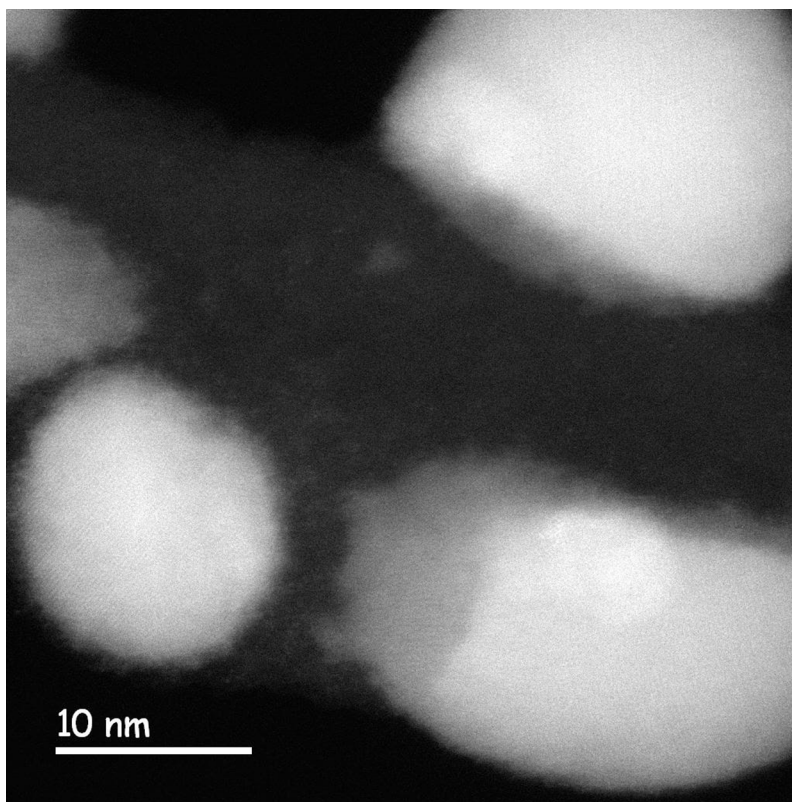

Figure S1. HAADF image of Figure 5.

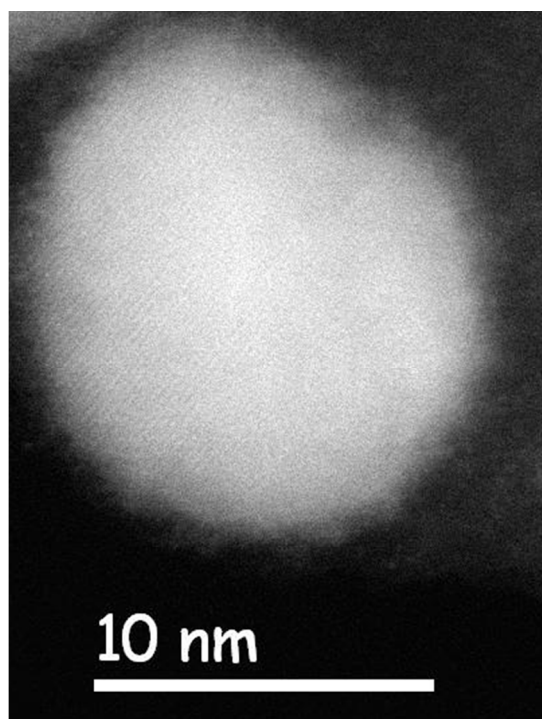

Figure S2. HAADF image of Figure 6.

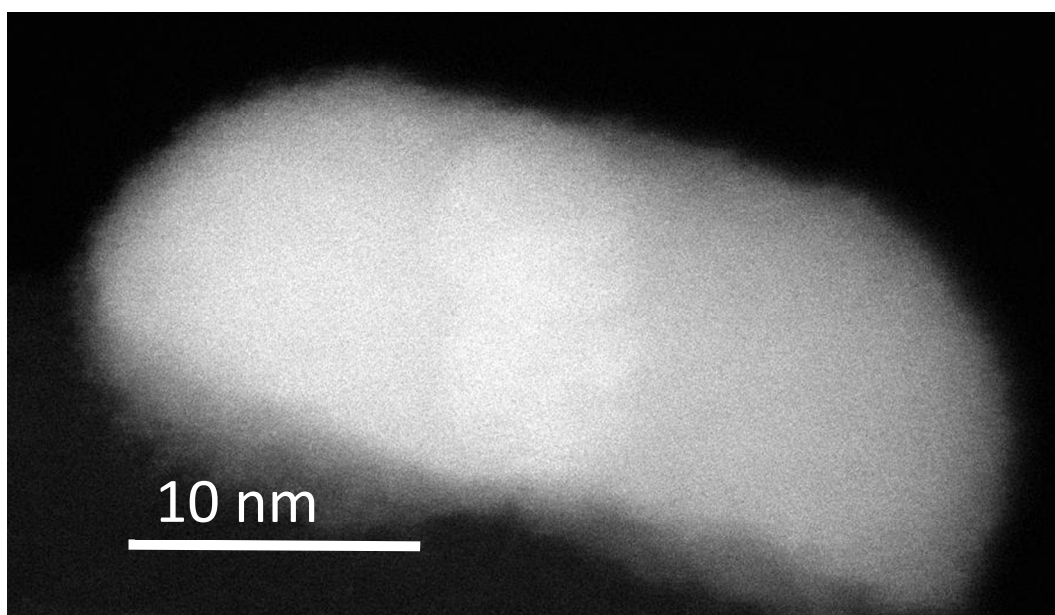

Figure S3. HAADF image of Figure 7.
